# Supplementary material
Source: Royal Society of Chemistry journal article supplement (doi:10.1039/d6ce00102e)
Supplement: d6ce00102e1.pdf [file d6ce00102e1.pdf]

## SUPPLEMENTARY INFORMATION

### Directionality in Cation–Anion Interactions Involving Chalconium Cations

Mariusz Michalczyk,<sup>\*a</sup> Steve Scheiner<sup>b</sup> and Wiktor Zierkiewicz<sup>\*a</sup>

<sup>1</sup>Faculty of Chemistry, Wrocław University of Science and Technology, Wybrzeże Wyspiańskiego 27, 50-370 Wrocław, Poland, email: mariusz.michalczyk@pwr.edu.pl

<sup>2</sup> Department of Chemistry and Biochemistry, Utah State University Logan, Utah 84322-0300, United States

\*Correspondence to: mariusz.michalczyk@pwr.edu.pl, wiktoria.zierkiewicz@pwr.edu.pl.

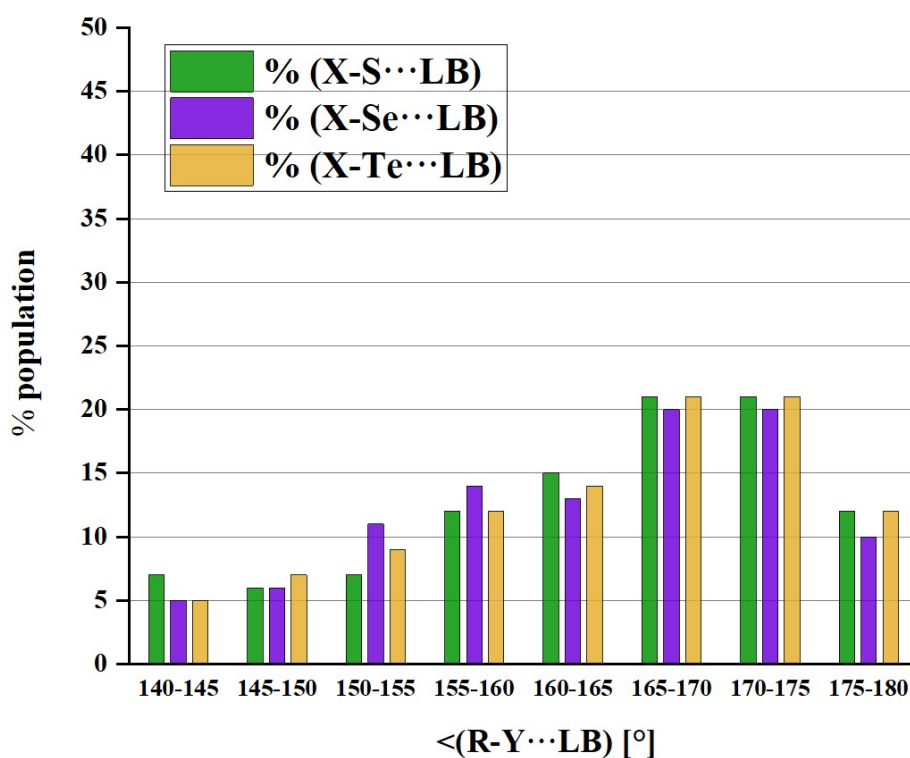

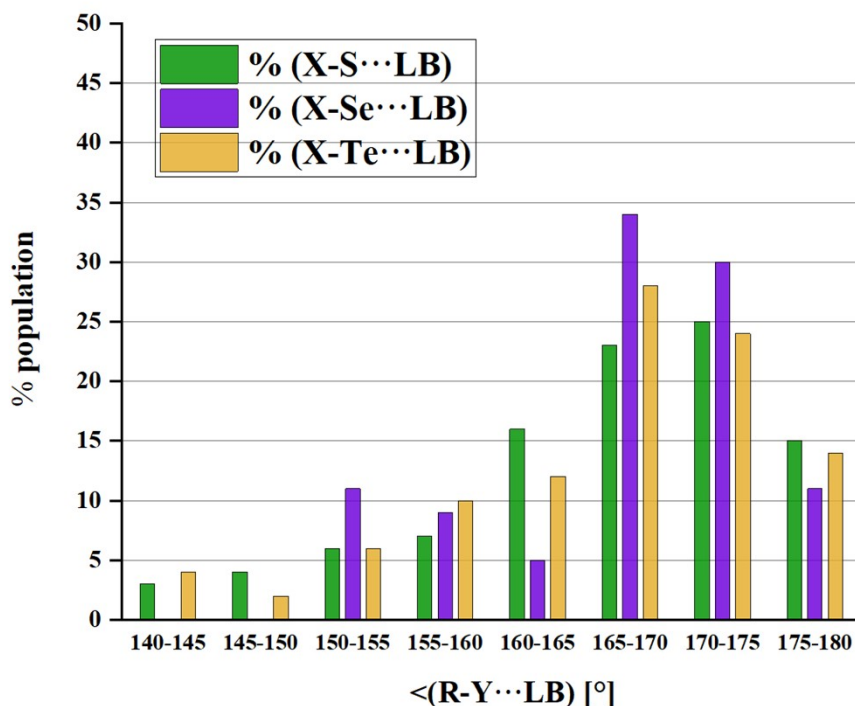

Fig. S1 Bar charts representing the distribution of obtained hits versus the R-Y...LB angle prior to cone correction for all contacts to chalconium cations of (top) all bases and (bottom) anions only.

Table S1. Coordinates of investigated structures from crystal database source.

|        |            |             |             |            |
|--------|------------|-------------|-------------|------------|
| AMOLUM | Sb         | 14.94970000 | 9.54680000  | 8.68360000 |
|        | F          | 13.17940000 | 9.54680000  | 8.01500000 |
|        | F          | 15.36550000 | 8.23940000  | 7.46970000 |
|        | F          | 14.45480000 | 8.26020000  | 9.91410000 |
|        | F          | 16.70430000 | 9.54680000  | 9.31490000 |
|        | F          | 15.36550000 | 10.85410000 | 7.46970000 |
|        | F          | 14.45480000 | 10.83330000 | 9.91410000 |
|        | S          | 12.16640000 | 9.54680000  | 5.59810000 |
|        | F          | 11.77690000 | 9.54680000  | 4.14050000 |
|        | F          | 13.18300000 | 8.43180000  | 5.50170000 |
|        | F          | 13.18300000 | 10.66170000 | 5.50170000 |
|        | N          | 10.60410000 | 7.64440000  | 5.60000000 |
|        | C          | 9.74910000  | 6.92100000  | 5.54890000 |
|        | C          | 8.64640000  | 5.98010000  | 5.48100000 |
|        | H          | 8.99910000  | 5.07000000  | 5.39700000 |
|        | H          | 8.08900000  | 6.18630000  | 4.70260000 |
|        | H          | 8.10800000  | 6.04880000  | 6.29650000 |
|        | N          | 10.60410000 | 11.44910000 | 5.60000000 |
|        | C          | 9.74910000  | 12.17250000 | 5.54890000 |
| C      | 8.64640000 | 13.11340000 | 5.48100000  |            |
| H      | 8.99910000 | 14.02350000 | 5.39700000  |            |
| H      | 8.08900000 | 12.90720000 | 4.70260000  |            |
| H      | 8.10800000 | 13.04470000 | 6.29650000  |            |
| MEKCAI | Se         | 3.44880000  | 2.80770000  | 9.70530000 |

|        |             |             |             |             |
|--------|-------------|-------------|-------------|-------------|
|        | C           | 4.26070000  | 4.21440000  | 8.64900000  |
|        | H           | 4.85130000  | 3.81770000  | 7.97580000  |
|        | H           | 4.78120000  | 4.80370000  | 9.23460000  |
|        | H           | 3.55990000  | 4.73370000  | 8.20230000  |
|        | C           | 2.39250000  | 1.99580000  | 8.29860000  |
|        | C           | 2.04210000  | 3.86400000  | 10.51720000 |
|        | H           | 1.71930000  | 1.40520000  | 8.69530000  |
|        | H           | 2.43880000  | 4.53720000  | 11.10780000 |
|        | H           | 2.97810000  | 1.47530000  | 7.70930000  |
|        | H           | 1.45280000  | 3.27840000  | 11.03770000 |
|        | H           | 1.94580000  | 2.69660000  | 7.77930000  |
|        | H           | 1.52280000  | 4.31070000  | 9.81640000  |
|        | Te          | 6.25650000  | 6.25650000  | 12.51300000 |
|        | Cl          | 5.76600000  | 3.83500000  | 11.93690000 |
|        | Cl          | 6.83260000  | 6.74700000  | 10.09150000 |
|        | Cl          | 8.67800000  | 5.68040000  | 13.00350000 |
|        | Cl          | 6.74700000  | 8.67800000  | 13.08910000 |
|        | Cl          | 5.68040000  | 5.76600000  | 14.93450000 |
|        | Cl          | 3.83500000  | 6.83260000  | 12.02250000 |
|        | Te          | 6.25650000  | 0.00000000  | 6.25650000  |
|        | Cl          | 5.68040000  | 0.49050000  | 8.67800000  |
|        | Cl          | 3.83500000  | -0.57610000 | 5.76600000  |
|        | Cl          | 6.74700000  | -2.42150000 | 6.83260000  |
|        | Cl          | 6.83260000  | -0.49050000 | 3.83500000  |
|        | Cl          | 8.67800000  | 0.57610000  | 6.74700000  |
|        | Cl          | 5.76600000  | 2.42150000  | 5.68040000  |
|        | Te          | 0.00000000  | 0.00000000  | 12.51300000 |
|        | Cl          | 2.42150000  | 0.57610000  | 12.02250000 |
|        | Cl          | -0.49050000 | 2.42150000  | 13.08910000 |
|        | Cl          | 0.57610000  | -0.49050000 | 14.93450000 |
|        | Cl          | -2.42150000 | -0.57610000 | 13.00350000 |
|        | Cl          | 0.49050000  | -2.42150000 | 11.93690000 |
|        | Cl          | -0.57610000 | 0.49050000  | 10.09150000 |
| RILFOL | C           | 1.79060000  | 6.77220000  | 10.53780000 |
|        | C           | 2.26460000  | 5.52470000  | 10.93840000 |
|        | H           | 1.93300000  | 4.72900000  | 10.53950000 |
|        | C           | 3.23730000  | 5.47040000  | 11.94150000 |
|        | H           | 3.57540000  | 4.62990000  | 12.22570000 |
|        | C           | 3.70920000  | 6.63370000  | 12.52180000 |
|        | H           | 4.36620000  | 6.59010000  | 13.20650000 |
|        | C           | 3.22610000  | 7.86100000  | 12.10410000 |
|        | H           | 3.55960000  | 8.65570000  | 12.50470000 |
|        | C           | 2.26090000  | 7.94620000  | 11.11130000 |
|        | H           | 1.92750000  | 8.79100000  | 10.83060000 |
|        | C           | 1.31050000  | 7.90040000  | 7.60890000  |
|        | C           | 2.68410000  | 7.93340000  | 7.60210000  |
|        | H           | 3.17740000  | 7.46790000  | 8.26800000  |
|        | C           | 3.34520000  | 8.65470000  | 6.61610000  |
|        | H           | 4.29530000  | 8.67920000  | 6.59900000  |
|        | C           | 2.61330000  | 9.34180000  | 5.65070000  |
|        | H           | 3.06570000  | 9.84680000  | 4.98480000  |
|        | C           | 1.23570000  | 9.29280000  | 5.65580000  |
|        | H           | 0.74220000  | 9.76580000  | 4.99500000  |
| C      | 0.56450000  | 8.55450000  | 6.62470000  |             |
| H      | -0.38380000 | 8.49490000  | 6.61780000  |             |

|  |    |             |             |             |
|--|----|-------------|-------------|-------------|
|  | C  | -0.72340000 | 8.51400000  | 9.96270000  |
|  | C  | -0.59500000 | 9.80200000  | 9.47310000  |
|  | H  | -0.04510000 | 9.97670000  | 8.71820000  |
|  | C  | -1.27900000 | 10.83540000 | 10.09620000 |
|  | H  | -1.21040000 | 11.71960000 | 9.75730000  |
|  | C  | -2.05780000 | 10.58290000 | 11.20540000 |
|  | H  | -2.51280000 | 11.29770000 | 11.63680000 |
|  | C  | -2.17830000 | 9.30020000  | 11.69500000 |
|  | H  | -2.71400000 | 9.12980000  | 12.46020000 |
|  | C  | -1.51030000 | 8.25410000  | 11.05990000 |
|  | H  | -1.59790000 | 7.36560000  | 11.38520000 |
|  | Te | 0.25000000  | 6.83020000  | 9.09410000  |
|  | C  | -0.01430000 | 4.41260000  | 6.27200000  |
|  | H  | -0.91000000 | 4.52970000  | 6.65210000  |
|  | H  | -0.07160000 | 3.85970000  | 5.46580000  |
|  | H  | 0.35960000  | 5.28930000  | 6.04270000  |
|  | C  | 0.87140000  | 3.73930000  | 7.27690000  |
|  | C  | 0.77810000  | 2.24360000  | 7.37960000  |
|  | H  | 1.36270000  | 1.92820000  | 8.10020000  |
|  | H  | 1.05880000  | 1.83980000  | 6.53220000  |
|  | H  | -0.14740000 | 1.98680000  | 7.57300000  |
|  | O  | 1.60120000  | 4.38810000  | 8.00560000  |
|  | B  | -1.36060000 | 3.77980000  | 10.89220000 |
|  | F  | -1.18110000 | 5.12420000  | 11.22800000 |
|  | F  | -2.18660000 | 3.68920000  | 9.76700000  |
|  | F  | -1.94180000 | 3.10970000  | 11.94630000 |
|  | F  | -0.12650000 | 3.22370000  | 10.58530000 |
|  | B  | -3.12790000 | 6.87340000  | 6.22580000  |
|  | F  | -3.30750000 | 5.52900000  | 5.89000000  |
|  | F  | -2.30200000 | 6.96400000  | 7.35100000  |
|  | F  | -2.54680000 | 7.54350000  | 5.17170000  |
|  | F  | -4.36200000 | 7.42950000  | 6.53270000  |
